# Supplementary material for: Mobile Technologies: Expectancy, Usage, and Acceptance of Clinical Staff and Patients at a University Medical Center
Source: PubMed Central journal article supplement (PMC4259908; doi:10.2196/mhealth.3799), 2014-10-21
Supplement: mhealth_v2i4e42_app1.pdf [file mhealth_v2i4e42_app1.pdf]

**Table 3.** Relevant questions of the questionnaire used for the doctors' survey.

| # | Question                                                                                                                                      | Possible answers                                                                                                                                                                                                                                                                                                                                |
|---|-----------------------------------------------------------------------------------------------------------------------------------------------|-------------------------------------------------------------------------------------------------------------------------------------------------------------------------------------------------------------------------------------------------------------------------------------------------------------------------------------------------|
| 1 | Are you currently using at least one mobile device that is able to run application software (apps)?                                           | Yes / no                                                                                                                                                                                                                                                                                                                                        |
| 2 | If yes, which device(s) are you using? (multiple answers allowed)                                                                             | iPhone / iPad / iPod touch / Android Smartphone / Android Tablet / Blackberry / others                                                                                                                                                                                                                                                          |
| 3 | How did you obtain the device?                                                                                                                | Private purchase or gift / provided by employer                                                                                                                                                                                                                                                                                                 |
| 4 | How likely do you think it is that you will use a tablet (iPad, Android tablet or other tablet) in the line of your work in the coming years? | already use one or more such devices at work / highly likely / somewhat likely / unlikely                                                                                                                                                                                                                                                       |
| 5 | If you already use a mobile device for your work, what are you using it for? (multiple answers allowed)                                       | Electronic communication (email, chat, ...) / reference (medication, therapies) / researching literature / learning (eLearning, CME, ...) / diagnostic aid at a patient's bedside / aid for ordering procedures / for patient education or information / accessing patient records / decision support for ordering lab tests or medical imaging |
| 6 | What are other (additional) activities where you think mobile devices can be helpful during your work?                                        | Free text answers                                                                                                                                                                                                                                                                                                                               |
| 7 | Which three apps (if any) are you using most in the line of your work?                                                                        | Free text answers                                                                                                                                                                                                                                                                                                                               |
| 8 | What would keep you from using mobile apps during contact with your patients?                                                                 | Concerns about the security of patient data / concerns about technical reliability of the devices / concerns about technical reliability of software / concerns about the hygiene of the devices /                                                                                                                                              |

|    |                                                                                      |                                                                                                                                                                                                                                                                                                                                                                                                                                                   |
|----|--------------------------------------------------------------------------------------|---------------------------------------------------------------------------------------------------------------------------------------------------------------------------------------------------------------------------------------------------------------------------------------------------------------------------------------------------------------------------------------------------------------------------------------------------|
|    |                                                                                      | patients might be unacquainted with such devices / there is no possibility for reimbursement / no support by the employer / I am unfamiliar with such devices and would have to invest time to learn about them / I do not yet have a device and will probably not get one / other reasons                                                                                                                                                        |
| 9  | What would keep you from using mobile apps while collaborating with your colleagues? | Concerns about the security of patient data / concerns about technical reliability of the devices / concerns about technical reliability of software / concerns about the hygiene of the devices / patients might be unacquainted with such devices / no support by the employer / I am unfamiliar with such devices and would have to invest time to learn about them / I do not yet have a device and will probably not get one / other reasons |
| 10 | What is your professional function?                                                  | Chief physician / consultant / attending / junior doctor                                                                                                                                                                                                                                                                                                                                                                                          |
| 11 | What kind of department do you work in?                                              | Patient wards / diagnostic or therapeutic (eg, radiology) / other medical department (eg, pathology) / other                                                                                                                                                                                                                                                                                                                                      |
| 12 | How many years of professional experience do you have?                               | None / 1 up to 2 / 2 up to 4 / 4 up to 6 / 6 up to 10 / 10 up to 20 / 20 up to 30 / 30 and more                                                                                                                                                                                                                                                                                                                                                   |
| 13 | How old are you?                                                                     | 18-25 / 26-35 / 36-45 / 46-55 / 56 and older                                                                                                                                                                                                                                                                                                                                                                                                      |
| 14 | Your gender?                                                                         | Female / male                                                                                                                                                                                                                                                                                                                                                                                                                                     |
| 15 | Do you have any additional remarks?                                                  | Free text answers                                                                                                                                                                                                                                                                                                                                                                                                                                 |
