# Supplementary material for: Mobile Technologies: Expectancy, Usage, and Acceptance of Clinical Staff and Patients at a University Medical Center
Source: PubMed Central journal article supplement (PMC4259908; doi:10.2196/mhealth.3799), 2014-10-21
Supplement: mhealth_v2i4e42_app2.pdf [file mhealth_v2i4e42_app2.pdf]

**Table 4.** Questionnaire used during the patients' survey.

| # | Question                                                                                                                                                                                                                                                                  | Possible answers                                                                                                                                                                                                                                                                                                                                                                                                                                                                                                                                                                              |
|---|---------------------------------------------------------------------------------------------------------------------------------------------------------------------------------------------------------------------------------------------------------------------------|-----------------------------------------------------------------------------------------------------------------------------------------------------------------------------------------------------------------------------------------------------------------------------------------------------------------------------------------------------------------------------------------------------------------------------------------------------------------------------------------------------------------------------------------------------------------------------------------------|
| 1 | Smartphones and tablet PCs are handheld computers that can run application software, so-called "apps" that can be download from so-called "App Stores" available on the Internet. Are you currently using a smartphone and/or tablet PC? If no, continue with question 6. | Yes / no                                                                                                                                                                                                                                                                                                                                                                                                                                                                                                                                                                                      |
| 2 | What kind of smartphone or tablet PC are you using? (multiple answers allowed)                                                                                                                                                                                            | iPhone / iPad / iPod Touch / Android Smartphone / Android Tablet / Blackberry / Windows Tablet / Windows Smartphone / other                                                                                                                                                                                                                                                                                                                                                                                                                                                                   |
| 3 | Are you currently using your smartphone or tablet PC to obtain or manage health related information or specific information for your condition?                                                                                                                           | Yes / no                                                                                                                                                                                                                                                                                                                                                                                                                                                                                                                                                                                      |
| 4 | For which health related activities do you use your device(s)?                                                                                                                                                                                                            | Electronic communication (email, chat, ...) with my doctor / electronic communication with self-help groups / electronic communication with my insurer / electronic communication with other health care providers / finding doctors / finding drug stores / managing my health data (blood sugar, heart rate, blood pressure, lab values) / for obtaining information about symptoms and conditions / for obtaining information about diagnostic and therapeutic procedures / for finding my own diagnosis / for documenting and managing fitness related data (eg, using Runtastic) / other |

- 5 Health apps are software applications dealing with health related aspects. Some apps provide information about health issues, others aid in measuring or managing blood pressure; there are also some for reminding you about taking your medication or getting a diagnosis. How many health apps do you currently have on your smartphone / tablet PC? None / 1-3 / 4-5 / 6-10 / more than 10
- 6 Which health apps are you using regularly? Free text answers
- 7 For which health related activities would you like to use your device(s)? Electronic communication (email, chat, ...) with my doctor / electronic communication with self-help groups / electronic communication with my insurer / electronic communication with other health care providers / finding doctors / finding drug stores / managing my health data (blood sugar, heart rate, blood pressure, lab values) / for obtaining information about symptoms and conditions / for obtaining information about diagnostic and therapeutic procedures / for finding my own diagnosis / for documenting and managing fitness related data (eg, using Runtastic) / other
- 8 Would it be all right with you if your doctor were to use his smartphone or tablet PC for storing and processing your data? Yes / no / don't know
- 9 Would it be all right with you if your doctor were to use his smartphone or tablet PC to explain something to you? Yes / no / don't know
- 10 Would it be all right with you if your Yes / no / don't know

doctor were to use his smartphone or tablet PC for looking for information relevant to your condition?

- |    |                                                                                                                                       |                                                                                                                                                                                                          |
|----|---------------------------------------------------------------------------------------------------------------------------------------|----------------------------------------------------------------------------------------------------------------------------------------------------------------------------------------------------------|
| 11 | Which concerns do you have about using smartphones / tablet PCs in the context of your health / condition? (multiple answers allowed) | None / concerns about data security / concerns about the technical reliability of the devices / concerns about the reliability of the software / the devices are too complicated to use / other concerns |
| 12 | Which other concerns do you have?                                                                                                     | Free text answers                                                                                                                                                                                        |
| 13 | Is your current stay at the hospital due to an illness lasting for more than 6 month?                                                 | Yes / no                                                                                                                                                                                                 |
| 14 | How old are you (in years)?                                                                                                           | 18-25 / 26-35 / 36-45 / 46-55 / 56-67 / 68 and older                                                                                                                                                     |
| 15 | What is your gender?                                                                                                                  | Female / male                                                                                                                                                                                            |
| 16 | What is your highest school leaving qualification?                                                                                    | Primary school / lower secondary school / intermediate secondary school / upper secondary school                                                                                                         |
| 17 | Do you want to add anything, eg criticism, additional remarks, or do you have any suggestions for us?                                 | Free text answers                                                                                                                                                                                        |
